# Supplementary material for: Agreement between Family Members and the Physician’s View in the ICU Environment: Personal Experience as a Factor Influencing Attitudes towards Corresponding Hypothetical Situations
Source: MDPI journal article supplement (doi:10.3390/healthcare11030345), 2023-01-25
Supplement: s1 [file s1]

## Supplementary Material

**Supplementary Table S1.** Proximity matrix of the answers in the four questions of the two hypothetical scenarios (Dice measure)<sup>(1)</sup>

|                       |                | Scenario 1 Question 1 |             |             |             | Scenario 1 Question 2 |             |             |             | Scenario 2 Question 1 |             |             | Scenario 2 Question 2 |              |        |
|-----------------------|----------------|-----------------------|-------------|-------------|-------------|-----------------------|-------------|-------------|-------------|-----------------------|-------------|-------------|-----------------------|--------------|--------|
|                       |                | Intensivists          | Family      | Patient     | Uncertain   | Intensivists          | Family      | Patient     | Uncertain   | Intensivists          | Family      | Uncertain   | Shouldn't stop        | Intensivists | Family |
| Scenario 1 Question 1 | Family         | .000                  |             |             |             |                       |             |             |             |                       |             |             |                       |              |        |
|                       | Patient        | .000                  | <b>.600</b> |             |             |                       |             |             |             |                       |             |             |                       |              |        |
|                       | Uncertain      | .000                  | .000        | .000        |             |                       |             |             |             |                       |             |             |                       |              |        |
| Scenario 1 Question 2 | Intensivists   | .220                  | <b>.632</b> | .535        | .059        |                       |             |             |             |                       |             |             |                       |              |        |
|                       | Family         | .062                  | <b>.749</b> | .585        | .020        | <b>.746</b>           |             |             |             |                       |             |             |                       |              |        |
|                       | Patient        | .062                  | .569        | <b>.877</b> | .061        | .515                  | .583        |             |             |                       |             |             |                       |              |        |
|                       | Uncertain      | .000                  | .094        | .062        | <b>.706</b> | .000                  | .000        | .000        |             |                       |             |             |                       |              |        |
| Scenario 2 Question 1 | Intensivists   | .581                  | .000        | .078        | .182        | .194                  | .060        | .135        | .171        |                       |             |             |                       |              |        |
|                       | Family         | .068                  | <b>.733</b> | <b>.784</b> | .067        | <b>.630</b>           | <b>.667</b> | <b>.763</b> | .106        | .000                  |             |             |                       |              |        |
|                       | Uncertain      | .000                  | .130        | .167        | <b>.444</b> | .132                  | .155        | .176        | <b>.368</b> | .000                  | .000        |             |                       |              |        |
| Scenario 2 Question 2 | Shouldn't stop | .148                  | .158        | .112        | .069        | .162                  | .167        | .140        | .065        | .133                  | .137        | .061        |                       |              |        |
|                       | Intensivists   | .177                  | .578        | .597        | .139        | <b>.670</b>           | .560        | .595        | .154        | .190                  | <b>.681</b> | .151        | .000                  |              |        |
|                       | Family         | .106                  | <b>.670</b> | <b>.730</b> | .104        | .598                  | <b>.627</b> | <b>.709</b> | .118        | .074                  | <b>.829</b> | .130        | .000                  | <b>.774</b>  |        |
|                       | Uncertain      | .053                  | .107        | .206        | .350        | .127                  | .131        | .214        | <b>.333</b> | .146                  | .166        | <b>.364</b> | .000                  | .000         | .000   |

(1) Similarities larger than 0.6 are bold. Lower than 0.3 are grayed out.
